# Supplementary material
Source: PubMed Central journal article supplement (PMC4340763)
Supplement: NIHMS651009-supplement-1.pdf [file NIHMS651009-supplement-1.pdf]

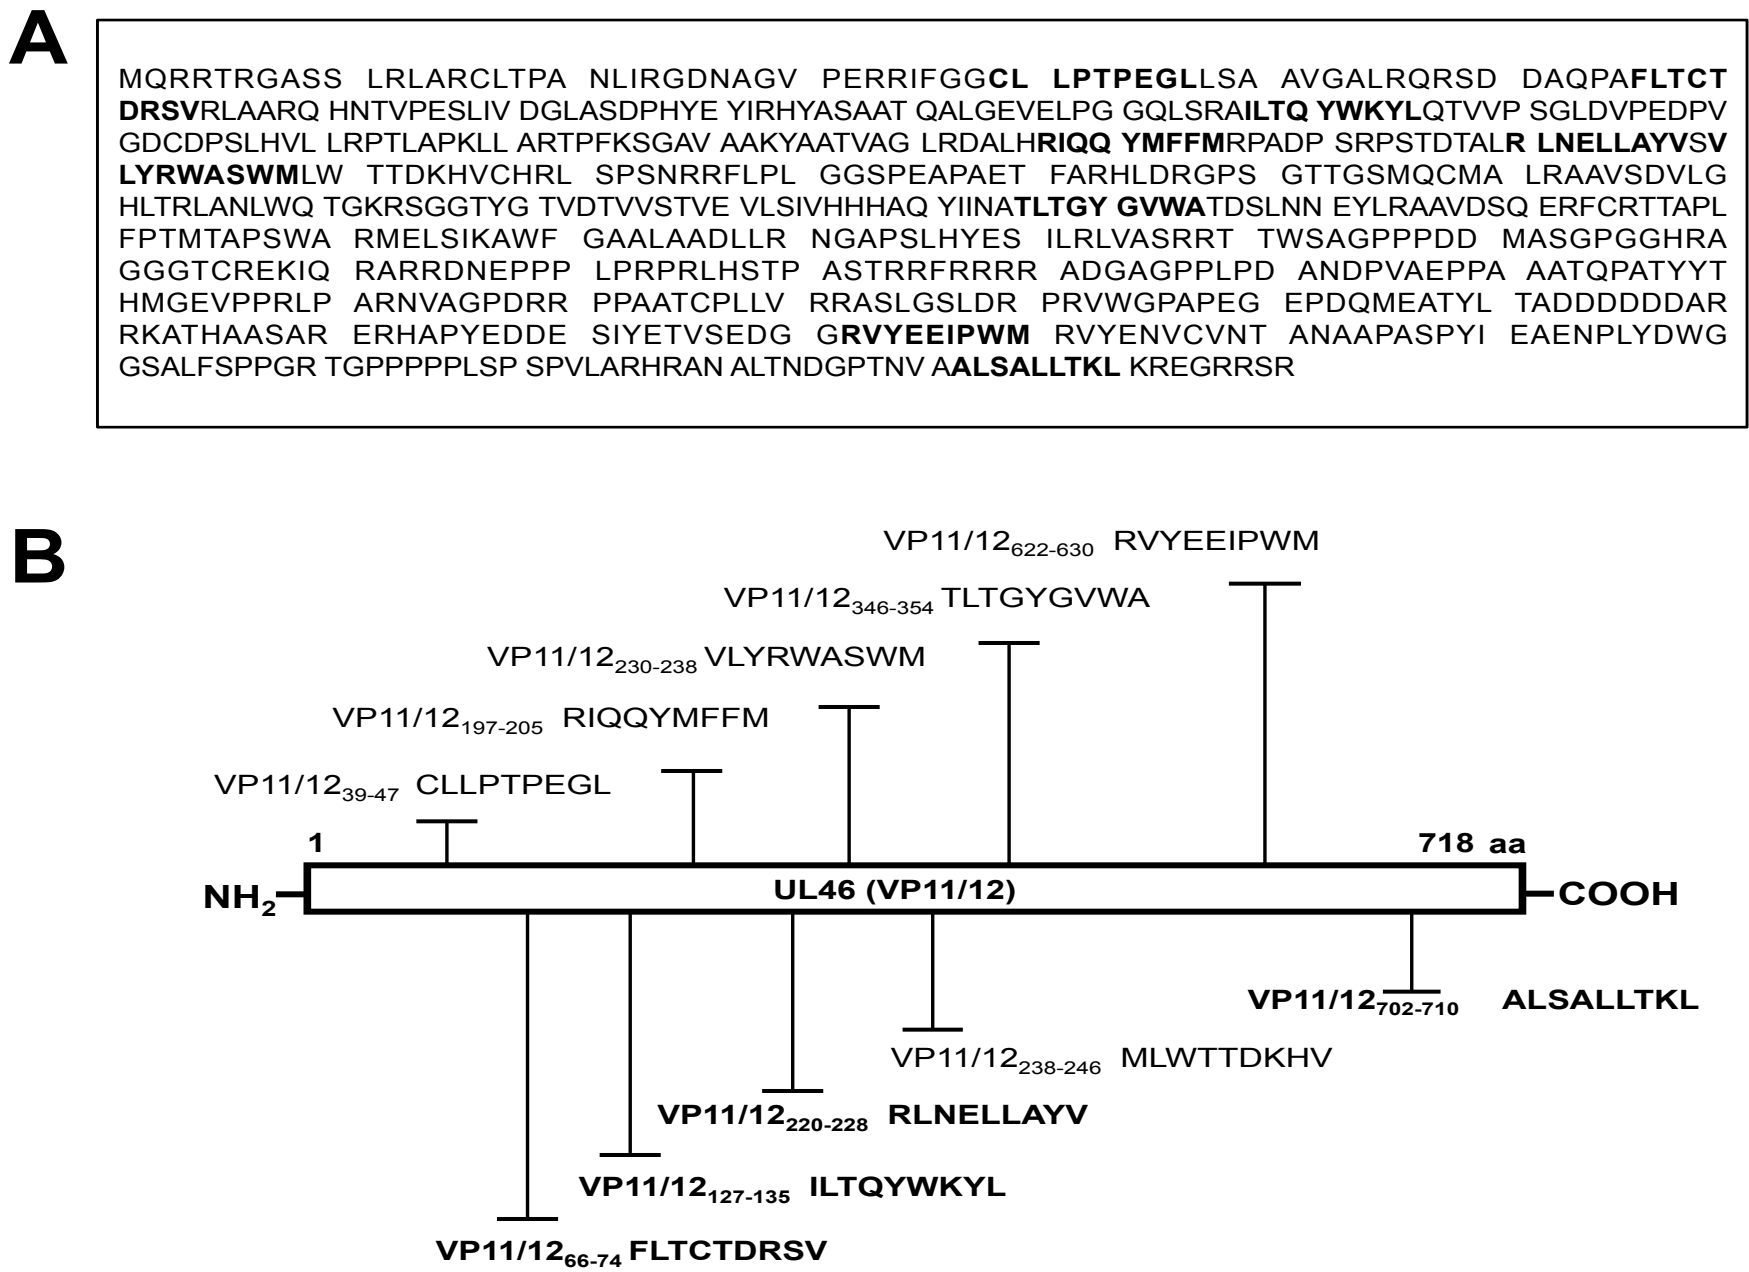

**Figure S1: Frequencies of CD8<sup>+</sup> T cell responses in HSV-seropositive asymptomatic individuals:** Schematic representation showing the relative location within HSV-1 VP11/12 of the potential CD8<sup>+</sup> T cell epitopes studied. (A) Sequence of HSV-1 (strain 17) VP11/12 regions carrying potential HLA A\*0201 (HLA- A\*0201)-restricted T cell epitopes (amino acid in bold) were predicted using computer-assisted algorithms based on known HLA/peptide/TCR interactions, as described in *Materials and Methods*. (B) The amino acid sequence, in a single letter code, and the peptide positions based on the 716-aa sequence of VP11/12 are shown. The high-affinity immunodominant epitopes identified in this study are shown in bold.

Srivastava et. al. Table S1

### Comparative analysis of the sequences of HSV-1 immuno-dominant CD8<sup>+</sup> T cell VP11/12 epitopes between the strains of HSV-1, HSV-2 and across other human herpes viruses

| Virus Strain<br>(Accession number) | VP11/12 <sub>66-74</sub> <sup>a</sup> | VP11/12 <sub>220-228</sub> <sup>a</sup> | VP11/12 <sub>702-710</sub> <sup>a</sup> |
|------------------------------------|---------------------------------------|-----------------------------------------|-----------------------------------------|
| <b>HSV-1</b>                       |                                       |                                         |                                         |
| Strain 17(P10230)                  | FLTCTDRSV                             | RLNELLAYV                               | ALSALLTKL                               |
| Strain F (P08314)                  | <b>FLTCTDRSV</b>                      | <b>RLNELLAYV</b>                        | <b>ALSALLTKL</b>                        |
| Strain RH2 (LON6A1)                | <b>FLTCTDRSV</b>                      | <b>RLNELLAYV</b>                        | <b>ALSALLTKL</b>                        |
| <b>HSV-2</b>                       |                                       |                                         |                                         |
| Strain HG52 (P89466)               | <b>FLTGADRSV</b>                      | <b>RLSELLAYV</b>                        | <b>ALSALLTKL</b>                        |
| Strain 186 (I6U4Y7)                | <b>FLTGADRSV</b>                      | <b>RLSELLAYV</b>                        | <b>ALSALLTKL</b>                        |
| <b>VZV</b>                         |                                       |                                         |                                         |
| Strain Dumas (P09264)              | <b>FLDVVDARV</b>                      | <b>RVQEIAAYT</b>                        | <b>AASKRYTPL</b>                        |
| Strain V-Oka (Q4JQW3)              | <b>FLDVVDARV</b>                      | <b>RVQEIAAYT</b>                        | <b>AASKRYTPL</b>                        |
| <b>CMV</b>                         |                                       |                                         |                                         |
| Strain AD169 (P16783)              | <b>LLTCVMRGY</b>                      | <b>GITSLITCV</b>                        | <b>LVTALKAKR</b>                        |
| Strain Merlin (F5HA93)             | <b>LLTCVMRGY</b>                      | <b>EDNELVTAL</b>                        | <b>GITSLITCV</b>                        |

<sup>a</sup> The identical amino acids between HSV-1, HSV-2 and across other human herpes viruses are bolded.

**Table S1: Comparative analysis of the sequences of HSV-1 VP11/12 CD8<sup>+</sup> T cell epitopes between the strains of HSV-1 and HSV-2 and across other human herpes viruses.** The amino acid residues that are conserved across other human herpesviruses are shown in bold.
